RESEARCH ARTICLE

# I Just Ran a Thousand Analyses: Benefits of Multiple Testing in Understanding Equivocal Evidence on Gene-Environment Interactions

Vera E. Heininga<sup>1\*</sup>, Albertine J. Oldehinkel<sup>1</sup>, René Veenstra<sup>2</sup>, Esther Nederhof<sup>1</sup>

**1** University of Groningen, University Medical Center Groningen, Department of Psychiatry, Interdisciplinary Center Psychopathology and Emotion regulation, Groningen, the Netherlands, **2** University of Groningen, Department of Sociology, Groningen, the Netherlands

\* [v.e.heininga@umcg.nl](mailto:v.e.heininga@umcg.nl)

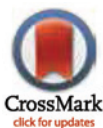

## Abstract

## Background

In psychiatric genetics research, the volume of ambivalent findings on gene-environment interactions (G x E) is growing at an accelerating pace. In response to the surging suspicions of systematic distortion, we challenge the notion of chance capitalization as a possible contributor. Beyond qualifying multiple testing as a mere methodological issue that, if uncorrected, leads to chance capitalization, we advance towards illustrating the potential benefits of multiple tests in understanding equivocal evidence in genetics literature.

## Method

We focused on the interaction between the serotonin-transporter-linked promotor region (5-HTTLPR) and childhood adversities with regard to depression. After testing 2160 interactions with all relevant measures available within the Dutch population study of adolescents TRAILS, we calculated percentages of significant ( $p < .05$ ) effects for several subsets of regressions. Using chance capitalization (i.e. overall significance rate of 5% alpha and randomly distributed findings) as a competing hypothesis, we expected more significant effects in the subsets of regressions involving: 1) interview-based instead of questionnaire-based measures; 2) abuse instead of milder childhood adversities; and 3) early instead of later adversities. Furthermore, we expected equal significance percentages across 4) male and female subsamples, and 5) various genotypic models of 5-HTTLPR.

## Results

We found differences in the percentages of significant interactions among the subsets of analyses, including those regarding sex-specific subsamples and genetic modeling, but often in unexpected directions. Overall, the percentage of significant interactions was 7.9% which is only slightly above the 5% that might be expected based on chance.

## OPEN ACCESS

**Citation:** Heininga VE, Oldehinkel AJ, Veenstra R, Nederhof E (2015) I Just Ran a Thousand Analyses: Benefits of Multiple Testing in Understanding Equivocal Evidence on Gene-Environment Interactions. PLoS ONE 10(5): e0125383. doi:10.1371/journal.pone.0125383

**Academic Editor:** Judith Homberg, Radboud University, NETHERLANDS

**Received:** September 12, 2014

**Accepted:** March 24, 2015

**Published:** May 27, 2015

**Copyright:** © 2015 Heininga et al. This is an open access article distributed under the terms of the [Creative Commons Attribution License](https://creativecommons.org/licenses/by/4.0/), which permits unrestricted use, distribution, and reproduction in any medium, provided the original author and source are credited.

**Data Availability Statement:** Given that participants have not given informed consent to have their personal data publicly shared, we are legally and ethically not allowed to publicly post our dataset. Data is therefore only available upon request to the TRAILS management team ([trails@umcg.nl](mailto:trails@umcg.nl)).

**Funding:** This research was made possible by a VICI grant from the Netherlands Organization for Scientific Research (NWO Vici 016.001/002) to Dr. Oldehinkel. The data used were collected as part of the TRacking Adolescents' Individual Lives Survey (TRAILS). Participating centers of TRAILS include various departments of the

University Medical Center and University of Groningen, the Erasmus University Medical Center Rotterdam, the University of Utrecht, the Radboud Medical Center Nijmegen, and the Parnassia Bavo group, all in the Netherlands. TRAILS has been financially supported by various grants from the Netherlands Organization for Scientific Research NWO (Medical Research Council program grant GB-MW 940-38-011; ZonMW Brainpower grant 100-001-004; ZonMw Risk Behaviour and Dependence grants 60-60600-97-118; ZonMw Culture and Health grant 261-98-710; Social Sciences Council medium-sized investment grants GB-MaGW 480-01-006 and GB-MaGW 480-07-001; Social Sciences Council project grants GB-MaGW 452-04-314 and GB-MaGW 452-06-004; NWO large-sized investment grant 175.010.2003.005; NWO Longitudinal Survey and Panel Funding 481-08-013), the Dutch Ministry of Justice (WODC), the European Science Foundation (EuroSTRESS project FP-006), Biobanking and Biomolecular Resources Research Infrastructure BBMRI-NL (CP 32), the participating universities, and Accare Center for Child and Adolescent Psychiatry.

**Competing Interests:** The authors have declared that no competing interests exist.

## Conclusion

Taken together, multiple testing provides a novel approach to better understand equivocal evidence on G x E, showing that methodological differences across studies are a likely reason for heterogeneity in findings - but chance capitalization is at least equally plausible.

## Introduction

In psychiatric genetics, the volume of studies examining gene-environment interactions (G x E) is increasing at an accelerating pace [1]. Nonetheless, a growing proportion of these studies appear non-replicable, with clear explanations yet to be found [2–5]. In 2005, Ioannidis responded to surging suspicions of systematic distortion by comparing the ratio of true to non-true simulated relationships, and was able to show that many findings are more likely to be false than true. Moreover, in speculating on “[w]hy most published research findings are false” [6], inconsistencies were coined to reflect bias, partly due to selective publication of the findings [6,7]. Inspired by Ioannidis and colleagues, we aimed to explore multiple testing within individual studies as a plausible explanation for heterogeneity of findings in G x E research on psychiatric disorders.

Ideally, a hypothesis reflects an a priori expectation and the variables involved are operationalized in a single, best possible, way. Subsequently, the test result indicates whether or not the null hypothesis should be rejected. In practice, however, this process usually takes a different form [6,8,9]. In the current era of big data, G x E researchers can often operationalize their genetic, environmental and outcome factors in multiple ways, at least some of which will yield insignificant results. One or more significant G x E findings are to be expected as well: the risk of a false positive (i.e. incorrectly rejected null hypothesis) rises exponentially when testing multiple models with the commonly used hypothesis testing approach. That is, the risk can capitalize from the commonly accepted error chance of 5% in a single test, to over 50% when exploring fifteen or more models (family-wise error:  $1 - 0.95^{15} \approx 0.54$ ; see, for example: [10]).

Consistent lines of evidence are essential for understanding G x E pathways to psychiatric disorders and advancing the field, but career benefits of reporting significant findings make it conceivable that published associations reflect a non-representative selection of all tests conducted [6,9]. Importantly, this downside of the availability of multiple operationalizations of single factors could be turned into a major advantage if researchers reported all options tried, rather than a biased selection. We postulate that a more transparent overview of all test results could not only reduce publication bias, but also help to move beyond the statement that “most research findings are false” [6] to an approach that allows fellow researchers in the field to consider alternative explanations for ambivalent findings.

This more transparent approach will be illustrated using the interaction between the serotonin-transporter-linked promotor region (5-HTTLPR) and childhood adversities with regard to depression. After Caspi and colleagues [11] reported that childhood adversities had the most detrimental effects on depression among those who carried the 5-HTTLPR short allele, studies exploring this interplay rapidly accumulated. Similar to other genotypes in psychiatric genetics research, however, the original findings of Caspi and colleagues [11] often appeared non-replicable, and even meta-analytical efforts have failed to detect converging lines of evidence [4,12–14].

The exceptional amount of effort devoted to this interaction provides an excellent opportunity to consider possible causes of research equivocality. These can be explored by

comparing multiple tests involving varying operationalizations of *5-HTTLPR*, childhood adversities and depression available within a single study. Important explanations for the inconsistent findings are reviewed below, followed by a description of how these were incorporated in the present study.

## Proposed explanations for inconsistent G x E findings

In this section, we describe three commonly acknowledged explanations for inconsistent G x E findings, followed by two explanations that are largely disregarded. First, diverging gene-environment interaction effects are often assumed to arise from differences in the quality of the assessment. More specifically, due to recall bias and interpretation problems of self-report questionnaires, data collected using structured face-to-face interviews conducted by trained interviewers are generally considered more reliable [15]. The lower reliability of self-reports may reduce the power and validity of the interaction tests, possibly explaining why G x E studies using more objective measures have generally yielded more consistent G x E evidence [12,16].

Second, as carriers of genetic risk factors may respond differently to mild and severe childhood adversities than non-carriers, inconsistencies in gene-environment interaction findings may also arise from differences in severity of the childhood adversities examined [17]. With respect to *5-HTTLPR*, the original Caspi et al. [11] study showed a significant moderation by genotype of both the link between childhood maltreatment and depression and the link between milder stressful life events and depression. In contrast, replication studies focusing on severe childhood adversities reported more often significant gene-environment interaction effects than studies involving milder events [12,18], indicating that the probability of significance may co-vary with the severity of the childhood adversity under study.

Third, it may be that individuals are at higher risk of developing psychopathology if they were exposed to adversities in the early stages of their lives [19,20]. That is, effects of environmental adversity on later outcomes may depend on the timing of the adversity [21]. Temporal differences in programming effects of stress on the brain have been proposed because brains are more receptive to stress before the age of five [22]. Programming effects in turn, would render individuals who were exposed to adversities within the first five years of life more prone to depression later on [23], especially when they carry risk alleles [24]. The divergence in G x E findings may thus be due to the difference in the time frame of the adversity measure.

While several studies have addressed these issues, only few researchers have suggested that inconsistencies in G x E research may arise from differences in sex distribution of the sample [25]. There are good reasons to believe that effects of *5-HTTLPR* vary as a function of sex [26], because male and females differ in crucial aspects of the serotonergic neurotransmission encoded by allelic variation in the *5-HTTLPR* gene [27], and the effects of serotonin are increased by the presence of female hormones (i.e. estrogens such as estradiol) [26]. Despite the existence of sex-specific mechanisms, most G x E studies involving *5-HTTLPR* have used mixed samples—implicitly assuming no sex-specific mechanisms—and sex-related heterogeneity in findings has commonly been disregarded (but see [16,28]).

Lastly, inconsistencies in G x E research may also be explained by diverging ways of genotype-coding. The *5-HTTLPR* genotype encompasses a short (S) allele and a long (L) allele variant, which can be modeled in various ways, each based on a different assumption on the relative risk associated with the allelic combinations. Whereas the additive genetic model assumes that the risk increases linearly with the number of S alleles, the dominant model assumes that carriers of the S-alleles have equal risks, regardless of whether their genotype is hetero- or homozygous, and the co-dominant model allows any association pattern without a priori assumptions. Furthermore, in addition to the traditional, so-called biallelic approach of

modeling, a triallelic approach has become increasingly popular. The triallelic approach is based on the notion that the L allele is functionally equivalent to the S allele in the presence of the g allele variant of the Single Nucleotide Polymorphisms (SNP) rs25531 ( $L_g = S$ ; see for more details: [29]). Whereas researchers seem to agree upon using the triallelic approach when possible, so far, justification of which genetic model is to be preferred over the others is inconclusive [16,28,30,31]. Although the choice of genetic model may affect association patterns [25,28], several studies found similar effects for different 5-HTTLPR classifications [32–34].

## This study

In response to suspicions of publication bias among many, and inspiring findings by a few (e.g. [6,35–38]), we examine chance capitalization as a possible explanation for heterogeneity in G x E research. In the remainder of this paper we evaluate the explanations for equivocal G x E findings proposed so far, including chance capitalization, within a single study. Under the assumption that the aforementioned methodological explanations for heterogeneity in G x E research are correct, subsets of regression models containing different measures of childhood adversities and depressive symptoms should yield varying percentages of significant effects.

Using chance capitalization as the competing hypothesis, we expected a significant interaction between 5-HTTLPR and childhood adversities in more than 5% of the analyses, and especially in the subsets involving: 1) measures based on structured interviews instead of self-report questionnaires; 2) measures of abuse instead of milder childhood adversities; and 3) measures of early adversities instead of those experienced at a later age. Furthermore, we expected the percentages of significant effects to be equal across 4) sex and 5) varying genetic models of 5-HTTLPR. Absence of meaningful association patterns, with randomly distributed significant effects in, on average, approximately 5% of the analyses, were considered support for publication bias in favor of false positive findings as an explanation for the inconsistent findings reported in the literature [6].

## Method

### Sample

The data were collected as part of the TRacking Adolescents' Individual Lives Survey (TRAILS), a prospective cohort study of Dutch adolescents [39,40]. Five assessment waves have been completed to date, of which the present study uses data of the first four waves that ran from March 2001 to July 2002 (T1), September 2003 to December 2004 (T2), September 2005 to August 2007 (T3), October 2008 to September 2010 (T4). The study was approved by the Dutch Central Committee on Research Involving Human Subjects (CCMO). Participants were treated in compliance with APA ethical standards, and all measurements were carried out with their adequate understanding and written consent.

At T1, 2230 (pre-)adolescents were enrolled in the study (response rate 76%, mean age 11.1,  $SD = 0.6$ , 51% girls) [41], of whom 96% ( $N = 2149$ , mean age 13.6,  $SD = 0.5$ , 51% girls) participated at T2. The response rates at T3 and T4 were, respectively, 81% ( $N = 1816$ , mean age 16.3,  $SD = 0.7$ , 52% girls) and 83% ( $N = 1881$ , mean age 19.1,  $SD = 0.6$ , 52% girls). The data collection included, among many other things, self-report and parent-report questionnaires, a psychiatric diagnostic interview, and a life stress interview.

### Measures

**Depressive symptoms.** Depressive symptoms were assessed using three different instruments, which yielded nine measures in total (for an overview, see Table 1).

**Table 1. Descriptive statistics of the variables used in the study.**

|                              | Resp.    | Instrument used / genetic approach                                                 | Age  | label                | Males |                  | Females |                   | Total |                   |
|------------------------------|----------|------------------------------------------------------------------------------------|------|----------------------|-------|------------------|---------|-------------------|-------|-------------------|
|                              |          |                                                                                    |      |                      | Mean  | SD               | Mean    | SD                | Mean  | SD                |
| <b>Depressive symptoms</b>   | Parent   | Child Behavior Checklist (CBCL)                                                    | 11   | CBCL <sub>1</sub>    | 0.20  | 0.20             | 0.18    | 0.19              | 0.19  | 0.20              |
|                              | Parent   | Child Behavior Checklist (CBCL)                                                    | 13   | CBCL <sub>2</sub>    | 0.15  | 0.19             | 0.15    | 0.19              | 0.15  | 0.19              |
|                              | Parent   | Child Behavior Checklist (CBCL)                                                    | 16   | CBCL <sub>3</sub>    | 0.14  | 0.18             | 0.17    | 0.22              | 0.16  | 0.21              |
|                              | Parent   | Child Behavior Checklist (CBCL)                                                    |      | CBCL <sub>mean</sub> | 0.16  | 0.16             | 0.16    | 0.16              | 0.16  | 0.16              |
|                              | Self     | Youth Self Report (YSR)                                                            | 11   | YSR <sub>1</sub>     | 0.29  | 0.25             | 0.30    | 0.25              | 0.29  | 0.25              |
|                              | Self     | Youth Self Report (YSR)                                                            | 13   | YSR <sub>2</sub>     | 0.22  | 0.22             | 0.32    | 0.29              | 0.27  | 0.26              |
|                              | Self     | Youth Self Report (YSR)                                                            | 16   | YSR <sub>3</sub>     | 0.22  | 0.22             | 0.36    | 0.30              | 0.30  | 0.27              |
|                              | Self     | Youth Self Report (YSR)                                                            |      | YSR <sub>mean</sub>  | 0.25  | 0.19             | 0.32    | 0.23              | 0.28  | 0.21              |
| <b>Childhood adversities</b> | Self     | CIDI, lifetime prevalence Major Depressive Episode                                 |      | CIDI                 | 6.9   | ( <i>n</i> = 76) | 16.8    | ( <i>n</i> = 190) | 11.9  | ( <i>n</i> = 266) |
|                              | Parent   | Questions on pre- & perinatal risks                                                | >1   | PPRISKS              | 1.45  | 1.03             | 1.41    | 1.08              | 1.43  | 1.05              |
|                              | Parent   | TRAILS Family History Interview on Childhood Events                                | >11  | CE                   | 0.70  | 0.83             | 0.73    | 0.86              | 0.71  | 0.84              |
|                              | Parent   | Questions on Long Term Difficulties                                                | >11  | LTD                  | 0.45  | 0.72             | 0.36    | 0.65              | 0.40  | 0.69              |
|                              | Parent   | Subjective ratings of the stressfulness of the participant's life during childhood | >5   | parent0-5STRESS      | 1.62  | 2.03             | 1.54    | 2.07              | 1.58  | 2.05              |
|                              | Parent   | Subjective ratings of the stressfulness of the participant's life during childhood | 6–11 | parent6-11STRESS     | 2.39  | 2.35             | 2.48    | 2.48              | 2.43  | 2.42              |
|                              | Self     | Subjective ratings of the stressfulness of the participant's life during childhood | >5   | self0-5STRESS        | 2.52  | 2.06             | 2.32    | 1.86              | 2.42  | 1.96              |
|                              | Self     | Subjective ratings of the stressfulness of the participant's life during childhood | 6–11 | self6-11STRESS       | 3.48  | 2.29             | 3.28    | 2.26              | 3.37  | 2.28              |
|                              | Self     | Childhood Trauma Questionnaire (CTQ)                                               | >16  | verbalABUSE          | 1.69  | 0.69             | 1.79    | 0.80              | 1.74  | 0.76              |
|                              | Self     | Childhood Trauma Questionnaire (CTQ)                                               | >16  | physABUSE            | 1.18  | 0.32             | 1.19    | 0.36              | 1.18  | 0.34              |
| <b>Genotype</b>              | Self     | Childhood Trauma Questionnaire (CTQ)                                               | >16  | sexABUSE             | 1.03  | 0.17             | 1.09    | 0.33              | 1.06  | 0.27              |
|                              | SS/ S'S' |                                                                                    |      |                      | 17.9  | 25.2             | 16.5    | 23.6              | 17.2  | 24.4              |
|                              | LS/ L'S' |                                                                                    |      |                      | 45.2  | 48.1             | 48.3    | 51.7              | 46.8  | 50.1              |
|                              | LL/ L'L' |                                                                                    |      |                      | 36.9  | 26.7             | 35.2    | 24.7              | 36.0  | 25.6              |

Note: Resp. (column 2) refers to the type of informant or, for the 5-HTTLPR genotype, to the allele; Age (column 3) reflects the approximate age at measurement if relevant; with regard to the CIDI and 5-HTTLPR, instead of means and SD, the descriptive statistics denote prevalence percent with frequency in brackets. With regard to genotypes, instead of means and SD, the descriptive statistics denote prevalence percent for the biallelic (i.e. excluding SNP rs25531) and triallelic (i.e. including SNP rs25531) approach respectively. For exact computation of genetic models, see supplementary material.

doi:10.1371/journal.pone.0125383.t001

Participants' parents reported on depressive symptoms by means of the 13-item DSM-oriented Affective Problem Scale [42] of the Child Behavior Checklist (CBCL; [43]), the participants themselves reported on depressive symptoms by its self-report variant, the 13-item Affective Problem Scale of the Youth Self-Report (YSR; [39]). Both instruments assessed depressive symptoms over the last six months, with possible answers 0 = not true, 1 = somewhat true or sometimes true, and 2 = very true or often true. The CBCL and YSR were assessed at T1 (CBCL<sub>1</sub>,  $\alpha = .68$ ; YSR<sub>1</sub>  $\alpha = .77$ ), T2 (CBCL<sub>2</sub>,  $\alpha = .73$ ; YSR<sub>2</sub>  $\alpha = .72$ ) and T3 (CBCL<sub>3</sub>,  $\alpha = .76$ ;

YSR<sub>3</sub>,  $\alpha = .78$ ). In addition to the scores for each assessment wave separately, we calculated the mean over these three time points, labeled as CBCL<sub>mean</sub> and YSR<sub>mean</sub>, respectively.

The presence of a lifetime Major Depressive Episode according to the Diagnostic and Statistical Manual of Mental Disorders (DSM-IV; [44]) was assessed at T4, using the World Health Organization Composite International Diagnostic Interview (WHO CIDI; version 3.0). The CIDI has been used in a large number of surveys worldwide [45], and shown to have good concordance with clinical diagnoses [46,47].

**Childhood adversities.** Exposure to childhood adversities was operationalized in ten different ways (for an overview, see Table 1). ‘Pre- and perinatal risks’ (ppRISKS) were assessed at T1 in an interview with one of the parents, usually the mother, and included questions about maternal prenatal smoking, maternal prenatal alcohol use, birth weight, gestational age, and pregnancy and delivery complications. Maternal prenatal smoking was coded as follows: 0 = no smoking; 1 = 10 cigarettes a day or less; 2 = more than 10 cigarettes a day. Maternal prenatal alcohol use was coded as follows: 0 = no alcohol use, 1 = up to three glasses per week, 2 = four glasses per week or more. Birth weight was coded as 0 = normal birth weight and 1 = either low (< 2,500 g) or high (> 4,500 g) birth weight. Gestational age was recoded into two groups: 0 = normal (between 34 and 42 weeks) and 1 = abnormal (33 weeks or less, or more than 42 weeks). Pregnancy and delivery complications were coded as 0 = no complications; 1 = between one and four complications; 2 = five or more complications. The index of pre- and perinatal risks was composed by adding the scores of these variables.

The measure ‘Childhood events’ (CE) reflects stressful events that occurred before T1, and was also assessed at the T1 parent interview. The variable was created by summing the following events: severe (physical or mental) disease of father or mother; severe illness (life-threatening or threat of serious permanent effects) of a sibling; death of a household member; parental divorce; and absence from home for three months or longer.

‘Long term difficulties’ (LTD) were assessed with a questionnaire completed by parents at T2, and reflects the sum score of the following difficulties: chronic disease or handicap of the participant, chronic disease or handicap of a household member, being bullied, long-lasting conflicts with a household member, and long-lasting conflicts with someone else, all experienced before T1.

Four measures involved subjective ratings of the stressfulness of the participants’ lives during early and later childhood. These were assessed at T2 using parent- and self-reported ratings of the overall stressfulness of the child’s life before the age of five (parent0-5STRESS and self0-5STRESS) and from age six to age eleven (parent6-11STRESS and self6-11STRESS). Parents were asked ‘How stressful was your child’s life in this life phase?’, and the participants ‘How many stressful events did you experience in this period?’ The stressfulness was rated on an 11-point scale, ranging from 0 = not at all to 10 = very much.

Three measures represented traumatic youth experiences before the age of sixteen years, as reported retrospectively by the adolescents at T4, with questions based on the Childhood Trauma Questionnaire (CTQ; [48]). Verbal abuse (verbalABUSE,  $\alpha = .84$ ) was measured by five questions ranging from screaming to threatening and physical abuse (physABUSE,  $\alpha = .73$ ) by six questions ranging from being hit to being beaten up; the occurrence of which could be rated as 1 = no, never; 2 = yes, one or two times; 3 = sometimes; 4 = often; 5 = very often. Sexual abuse (sexABUSE) was based on a list of five unwanted sexual acts by an adult family member, friend of the family or stranger, ranging from touching to sexual intercourse, the occurrence of which could be rated as 1 = never happened to me, 2 = happened once, or 3 = happened several times. The abuse measures reflect the mean of the ratings.

**5-HTTLPR.** DNA was obtained at T3 through a manual salting out procedure using either blood samples or buccal swabs, as delineated in detail by Miller, Dykes, and Polesky [49]. The

length polymorphisms of the serotonin transporter-linked polymorphic region (*5-HTTLPR*) were genotyped as described by Nederhof and colleagues [50].

The *5-HTTLPR* polymorphism was modeled in an additive, dominant and co-dominant way, which, combined with the biallelic and triallelic approach, yielded six different ways to operationalize genetic risk. In the additive genetic model, the risk associated with the LS genotype was coded as being half the size as the risk associated with the SS genotype, as compared to the LL genotype (LL = 0, LS = 1, SS = 2). In the S dominant model, the risk associated with the of SL and SS genotype was modeled as being equal to each other (LL = 0, LS = 1, SS = 1). In the co-dominant model, the risk associated with SS and LS was estimated using separate dummies, with LL serving as the reference group for both (dummy 1: LL = 0, LS = 0, SS = 1; dummy 2: LL = 0, LS = 1, SS = 0). These three genetic models were constructed using both the biallelic approach and the triallelic approach. In the latter case, the L allele was recoded into an S allele in the presence of an S allele of SNP rs25531 (Lg = S). For an overview of *5-HTTLPR* coding in regression models per genetic model, see (S1 Table). Please bear in mind that, due to the dummy coding as dictated by the co-dominant model, the six genetic models were in the statistical analyses tested by a total of eight interaction terms.

## Analytical strategy

We tested a total of 2160 interaction effects between *5-HTTLPR* and childhood adversities on depressive symptoms, using ordinary least squares (for continuous outcomes) and logistic regression (for binary outcomes) in SPSS (version 21; [51]). The tests were conducted in a sample comprised of both males and females (See Table 2 for an overview of all analyses; 720 regression models, sample sizes ranging from 779 to 1050), a male sample (720 regression models; sample sizes 341 to 488), and a female sample (720 regression models; sample sizes ranging from 438 up to 562). Each analytic model included one of the childhood adversity measures, one of the operationalizations of *5-HTTLPR* (in case of co-dominant genetic models: two dummy variables), and one of the depression measures as outcome variable. We were primarily interested in the interaction between the childhood adversity and the *5-HTTLPR* measure.

In order to explore our hypotheses, we calculated the percentage of significant findings for subsets of regression analyses, by dividing the number of statistically significant ( $p < .05$ ) interaction effects by the total number of interaction effects tested, and multiplying this proportion by 100. Because the tests could be considered neither independent observations nor repeated observations, formal testing of the hypothesis that the percentage of significant interactions (in a given subset) exceeded chance level (i.e., 5%) was not possible. Nevertheless, to provide a guideline to determine which percentage can be considered indicative of a real interaction effect we calculated a confidence interval around 5%.

The number of tests in this study ranged between 144 and 1216 with an average of almost 400 (see Table 2). The tests conducted were clearly dependent, and were therefore considered not to reflect 400 independent repetitions, but considerably fewer. Given the substantial dependence among the tests (same sample, and partly same measures) and the fact that the number of tests performed varied widely around an average of 400, we chose a conservative approach and based the calculation on 200 independent tests. In this hypothetical situation, the upper bound of the confidence interval would be 8% ( $5\% \pm 1.96 * \sqrt{(5 * 95) / 200}$ ). In other words, we considered more than 8% significant interactions a fair indication that the percentage exceeded the Type 1 error rate dictated by the .05 alpha, and that the interaction as operationalized in the particular subset may actually exist in the population. In addition to evaluating the percentage of significant interactions, we visually inspected the distribution of significant findings by means of a plot that depicted the number of significant finding for each of the possible

**Table 2. Percentage of significant ( $p < .05$ ) G x E interaction effects per subset of analyses.**

| Relevant subsets                                             | Subset 1                         | Total tests    | Nr Sign | Subset 2                                                                                                                                    | Total tests     | Nr Sign | Subset 3        | Total tests    | Nr Sign   |
|--------------------------------------------------------------|----------------------------------|----------------|---------|---------------------------------------------------------------------------------------------------------------------------------------------|-----------------|---------|-----------------|----------------|-----------|
| Interview (subset 1) versus questionnaires (subset 2)        | ppRISKS; CE; CIDI                | 224 (842–1050) | 1       | (0.4%) LTD; self0-5STRESS; self6-11STRESS; parent6-11STRESS; verbalABUSE; physABUSE; sexABUSE; CBCL1; 2; 3; CBCL-mean; YSR1; 2; 3; YSR-mean | 1216 (779–1050) | 77      | (6.3%)          |                |           |
| Severe adversity (subset 1) versus mild adversity (subset 2) | verbalABUSE; physABUSE; sexABUSE | 216 (779–939)  | 4       | (1.9%) parent0-5STRESS; self0-5STRESS; parent6-11STRESS; self6-11STRESS                                                                     | 288 (828–1034)  | 27      | (9.4%)          |                |           |
| Early adversity (subset 1) versus late adversity (subset 2)  | parent0-5STRESS; self0-5STRESS   | 144 (828–1031) | 13      | (9.0%) self6-11STRESS; parent6-11STRESS                                                                                                     | 144 (829–1034)  | 14      | (9.7%)          |                |           |
| Males (subset 1) versus female (subset 2)                    | Males                            | 720 (341–488)  | 264     | (12.2%) Females                                                                                                                             | 720 (438–562)   | 132     | (6.1%)          |                |           |
| 5-HTTLPR, biallelic (subset 1) versus triallelic (subset 2)  | Biallelic                        | 360 (779–1050) | 26      | (7.2%) Triallelic                                                                                                                           | 360 (779–1050)  | 13      | (3.6%)          |                |           |
| 5-HTTLPR, dominant (subset 1) versus co-dominant (subset 2)  | Dominant                         | 180 (779–1050) | 7       | (3.9%) Co-dominant                                                                                                                          | 360 (779–1050)  | 18      | (5.0%) Additive | 180 (779–1050) | 14 (7.8%) |
| additive (subset 3)                                          |                                  |                |         |                                                                                                                                             |                 |         |                 |                |           |

Note: 'Total Tests' reflects number of total tests run, with in brackets the minimum and maximum sample size over all single tests conducted; 'Nr Sign' refers to number of significant findings by single tests ( $p < .05$ ), with significance rate over the relevant measures in brackets (i.e. number of significant findings relative to the total number of tests run). For meaning of abbreviations within each subset of measures, see [Table 1](#).

doi:10.1371/journal.pone.0125383.t002

interaction pathways. The absence of particular (non-random) patterns was regarded as random distribution of findings, and indicative of a significant presence of chance findings.

## Results

### Interview versus questionnaire

When comparing subsets of regression models that contained either interview-based or questionnaire-based measures, we found more significant interaction effects when using questionnaire-based measures (see [Table 2](#)). Whereas  $G \times E$  interaction tests involving interview-based measures yielded 0.4% significant interaction effects, tests based on questionnaires generated 6.3% significant interactions. None of these percentages exceeded the preset criterion of at least 8% significant effects; the number of interview-based significant interactions was even below what might be expected on the basis of chance.

### Severe versus mild adversity

Of all interaction effects containing severe childhood adversities 1.9% reached statistical significance. In contrast, inclusion of mild childhood adversities yielded 9.4% significant interactions (see [Table 2](#)), and therewith exceeded the preset 8%-criterion.

### Early versus late adversity

[Table 2](#) further shows that 9.0% of the interaction effects involving early childhood adversities, and 9.7% of those involving adversities in later childhood reached statistical significance, both of which were higher than what might be expected based on chance. Note that these two subsets both related to mild adversities, which had an overall significance prevalence of 9.4%.

### Males versus females

While the 720 analyses run in only female participants yielded 6.1% significant interactions, the same analyses run in male participants yielded 12.2% (see [Table 2](#)). Only the percentage in males exceeded the preset criterion of 8%.

### Genetic models

As depicted in [Table 2](#), regression models with *5-HTTLPR* coded either in accordance with the biallelic or triallelic statistical approach, yielded 7.2% and 3.6% significant interactions, respectively. In addition, we found 3.9% significant interaction effects when testing models containing the dominant genetic model of *5-HTTLPR*, whereas those containing the co-dominant or additive genetic models yielded respectively 5.0% and 7.8% significance. None of these percentages were higher than the preset criterion of 8%.

### Chance capitalization

Overall, from the 2160 number of interaction effects tested, 171 were significant ( $p < .05$ ), corresponding with a 7.9% overall significance rate. When ignoring the analyses regarding early versus late adversities (because these were nested within the subset of mild stressors), two subsets of analyses generated a percentage of significant interaction that exceeded the preset criterion for substantial elevation above chance level (8%), whereas two others yielded a percentage of significant interactions that was substantially below what might be expected on chance ( $< 2\%$ ). [Fig 1](#) shows that predominantly parent-reported long-term difficulties (LTD), parent-reported overall stressfulness of the child's life ( $_{parent0-5}STRESS$ ;  $_{parent6-11}STRESS$ ), and parent-reported

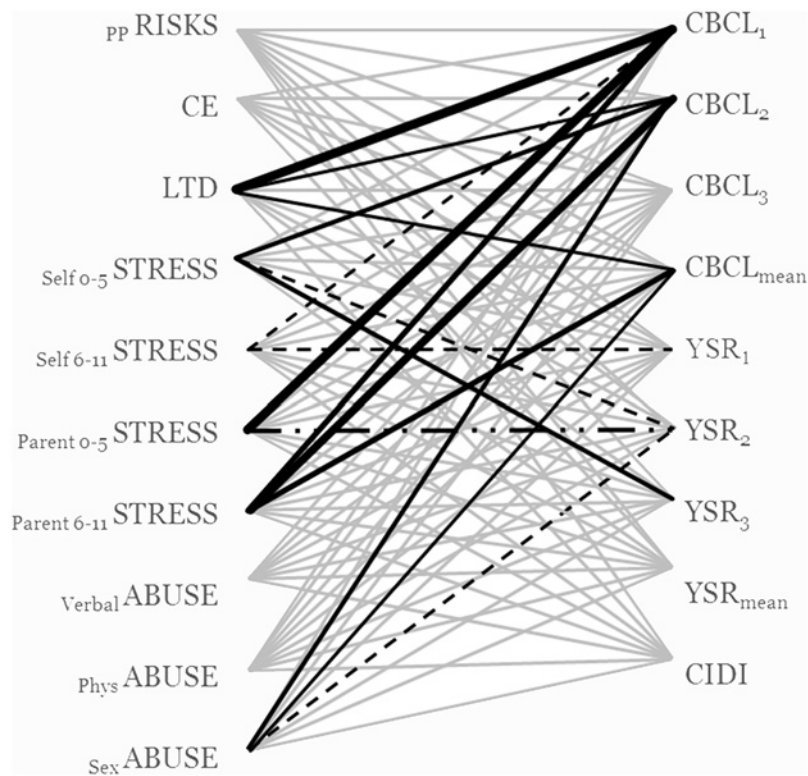

**Fig 1. Number of significant interaction effects per combination of measures.** Each line represents a possible interaction pathway between the ten childhood adversities (labels depicted on the left) and 5-HTTLPR genetic risk (i.e. additive, dominant and co-dominant way, which, combined with the biallelic and triallelic approach, yield six different ways to operationalize genetic risk) on depressive symptoms measured by the nine different instruments (labels depicted on the right side of the figure). Grey lines represent insignificance. Black lines represent the number of significant interaction effects ( $p < .05$ ) over six different ways to operationalize genetic risk: the bolder the black line, the higher the number of significant effects for that specific combination of measures. Solid black lines represent significant interactions by the SS genotype; dotted black lines represent significant interactions by LS genotype. Partially dotted lines represent significant interaction(s) of S-carriers.  $N = 779-1050$ , dependent on the combination of measures (see Table 2).

doi:10.1371/journal.pone.0125383.g001

depressive symptoms (CBCL), seem to yield the highest number of significant interaction effects with 5-HTTLPR.

## Discussion

Unraveling the genetic basis of psychiatric disorders appears to be challenging, and non-replications have become increasingly common in this area of research, particularly with regard to gene-environment interactions (G x E). Ioannidis [6] postulated chance capitalization as the main contributor to inconsistencies in G x E research. Starting from this premise, we evaluated the plausibility of alternative explanations, by examining patterns of significance related to specific methodological choices within a single dataset. In addition to chance capitalization, we explored the option that inconsistencies in G x E findings arise from differences in assessments, severity of the adversity, and timing of the adversity. Heterogeneity due to differences in the sex distribution of the sample or genetic model used was also explored. The database of the Dutch cohort study of adolescents TRAILS contains various different measures of childhood adversities and depressive symptoms in addition to genotypic information, and was

hence suitable for exploring the often-described interaction between *5-HTTLPR* and childhood adversities in predicting depressive symptoms.

With regard to the quality of assessments, we expected more significant interaction effects in analyses involving interview-based than in analyses involving questionnaire-based measures, but found the opposite pattern. Questionnaire-based measures, although assumed to be less reliable than structured face-to-face interviews assessed by trained interviewers [15], might thus be of less importance in explaining G x E heterogeneity than commonly assumed. Although, in our sample, questionnaire-based measures performed better than interview-based measures in terms of percentage of significant interactions, the number of significant interactions exceeded our preset 8%-criterion of what might be expected based on merely chance by 1.3%. This seemingly contradictory result, however, could also be explained by measurement properties and its associated power. That is, the high percentage of significance found for questionnaires was predominantly determined by significant findings in models based on scales (i.e. CBCL; 29 of the total 77), but also models based on single-item questionnaire variables (i.e. parent- and self-reported ratings of the overall stressfulness; 27 of the total 77). The higher number of significant findings for questionnaires may thus be partly explained by the lack of power of the dichotomous variable.

The significance rates in analyses that differed with respect to the severity of the childhood adversities were also contrary to what we expected based on prior findings, which suggest a higher probability of significance in case of severe adversities such as abuse [12,18]. Our analyses indicated the opposite: more significant interactions in models containing measures of mild childhood adversity than in those containing measures of abuse. Importantly, mild adversities were also far more common in TRAILS than more severe adversities, and the larger percentage of significant results may reflect the actual distribution of scores.

While it has been proposed that adversities experienced at an early age have more developmental impact than those experienced later in childhood [19,20,24], the timing of the adversities did not affect the number of significant G x E interactions in our sample. This suggests that the assumed timing effects cannot explain differences among studies with regard to their interaction with *5-HTTLPR*.

We found differences in significance rates as a function of sex. Although effects of *5-HTTLPR* on serotonergic neurotransmission possibly explain differences between males and females [26], only few authors have pointed out sex-specific mechanisms as possible reasons for heterogeneity [16,25,28]. Given that significant effects were found for males in particular, the difference may be due to hormone-driven sex differences in brain and behavior. That is, although sex differences are often disregarded, in females, serotonin may be conditional on the presence of female estrogens such as estradiol to exert its full effect [26]. The absence of female hormones before puberty could explain why significance rates were twice as high in males as in females, as TRAILS participants were approximately 11 to 19 years old. Across G x E studies, findings may thus co-vary by age differences across samples, at least for *5-HTTLPR*, childhood adversity and (pre)adolescent depression.

Finally, and again contrary to what we expected a priori, different genetic models yielded varying percentages of significance, and the biallelic approach seemed to yield more significant interactions than the triallelic approach. However, none of the genetic models yielded significance rates that substantially exceeded the a priori set criterion of 8%, so our study does not provide enough evidence to abolish the notion that the choice of genetic model does not influence the probability of significance [16,28,31].

## Methodological differences or chance capitalization?

As described above, we explored the consequences of a number of methodological differences among studies that have been proposed to explain inconsistencies in the field of G x E research, in this case the interaction of childhood adversities and *5-HTTLPR* with regard to depressive symptoms. The alternative hypothesis postulated chance capitalization to explain heterogeneity in findings [6]. In order to abandon the idea of chance capitalization as important contributor to the lack of consistent findings, the percentage of significance findings should be clearly higher than what would be expected on the basis of chance (about 8% in the present study) in at least some analyses. Interestingly, the overall percentage of significant interactions of 7.9% came close to the predefined threshold for an elevated significance rate of 8%. Still, it did not exceed this threshold, which makes it plausible that at least part of the heterogeneity in gene-environment interactions results from overpublication of false positive findings. The 8% criterion used is somewhat arbitrary but comparable to commonly used criteria to denote, for example, a 'large' or 'clinically relevant' effect. If we had based the calculations on 400 tests instead of 200, the criterion for considering a percentage clearly exceeding 5% would have been 7.1% and the conclusion on the likely presence of a gene by environment interaction would have been affirmative. The findings should therefore be interpreted with caution.

In some analyses, the percentage of significant interactions exceeded the threshold of 8%, but in others the significance rate found was lower than 5%. In other words, the percentages were somewhat randomly distributed around chance level. Moreover, the characteristics of the analyses that yielded relatively high significance rates did not correspond to what was expected in advance, which further support the idea of random fluctuations.

In line with earlier findings [38], our results suggest that at least part of the heterogeneity in gene-environment interactions reported is due to overpublication of false positive findings. Nonetheless, differences in sampling and measurement error may represent alternative explanations for the observed variability of results in the G x E literature, and our observation is too tentative to determine whether inconsistencies in the field of G x E research are explained by methodological differences or chance capitalization.

## Strengths and limitations

Our study has various strengths. First and foremost, we are among the first to provide a transparent overview of the many possible ways to operationalize a specific gene-environment interaction within a single cohort study and to actually test all these interactions in order to explore ways to deal with scientific threats like multiple testing and selective reporting. Beyond qualifying multiple testing as a mere methodological issue that can lead to chance capitalization, we illustrate the potential benefits of multiple tests in understanding ambivalence in the psychiatric genetics literature. A second strength is that our interaction tests were each based on a relatively large number of individuals, offering reasonable power and accuracy—at least for the total sample. That is, while part of the gender-specific regression analyses may have been underpowered because some outcome variables were dichotomous and main effects sizes for G and E depend on the variables used, the analyses using the total sample were sufficiently powered.

The study is also limited in a number of respects. First, we illustrated the possible role of chance capitalization by using *5-HTTLPR*. Although threats like multiple testing and selective reporting are likely equal within G x E research, the extent to which chance capitalization contributes to equivocal evidence may differ across genotypes. Second, we relied on a fairly large number of questionnaire-based measures and only few interview-based measures. Moreover, of the three interview-based measures, CIDI and CE may be less powered than continuous

questionnaire-based measures. Therefore, replication of these findings in studies with other and preferably more (continuous) interview-based measures is needed.

## Conclusion and Future Prospects

Taken together, our results demonstrate the need for caution in interpreting findings from datasets with comparable measures of the same construct. Obvious career benefits of reporting significant findings over null findings and easy access to comparable measures within one dataset may lead to overpublication of false positive findings. Hence, it is likely that chance capitalization explains at least partly the large number of inconsistencies in G x E research.

Large cohort studies could play a major role in paving ways towards more consistent G x E findings in future research. The availability of multiple operationalizations of single factors, now often disregarded or even suspected as source of selective reporting, could be turned into a major advantage if researchers reported all options tried, rather than a biased selection. This way, we can move beyond the statement that “most research findings are false”, towards a novel approach: critically discussing the range of available measures within each study to evaluate the plausibility of findings, given the likelihood of chance capitalization.

## Supporting Information

**S1 Table. Overview of 5-HTTLPR coding in regression models, per genetic model.**  
(DOCX)

## Acknowledgments

We are grateful to all adolescents, their parents and teachers who participated in the TRacking Adolescents' Individual Lives Survey (TRAILS) and to everyone who worked on this project to make it possible. In addition, we would like to thank Tina Kretschmer for her helpful comments on previous versions of the manuscript, and extremely careful and thoughtful review of the current manuscript.

## Author Contributions

Conceived and designed the experiments: VH AO EN. Analyzed the data: VH AO EN. Contributed reagents/materials/analysis tools: AO RV. Wrote the paper: VH AO EN RV.

## References

1. No Title (n.d.). Available: [http://apps.webofknowledge.com/CitationReport.do?product=UA&search\\_mode=CitationReport&SID=Z1G5TvhMhoiWty1X3p5&page=1&cr\\_pqid=3&viewType=summary](http://apps.webofknowledge.com/CitationReport.do?product=UA&search_mode=CitationReport&SID=Z1G5TvhMhoiWty1X3p5&page=1&cr_pqid=3&viewType=summary).
2. Eaves LJ (2006) Genotype x Environment interaction in psychopathology: fact or artifact? Twin Res Hum Genet 9: 1–8. Available: <http://www.ncbi.nlm.nih.gov/pubmed/16611461>. PMID: 16611461
3. Ioannidis JP, Ntzani EE, Trikalinos TA, Contopoulos-Ioannidis DG (2001) Replication validity of genetic association studies. Nat Genet 29: 306–309. Available: doi: [10.1038/ng749](https://doi.org/10.1038/ng749) PMID: 11600885
4. Munafò MR, Durrant C, Lewis G, Flint J (2009) Gene X environment interactions at the serotonin transporter locus. Biol Psychiatry 65: 211–219. Available: <http://www.ncbi.nlm.nih.gov/pubmed/18691701>. doi: [10.1016/j.biopsych.2008.06.009](https://doi.org/10.1016/j.biopsych.2008.06.009) PMID: 18691701
5. Colhoun HM, McKeigue PM, Smith GD (2003) Problems of reporting genetic associations with complex outcomes. Lancet 361: 865–872. Available: <http://linkinghub.elsevier.com/retrieve/pii/S0140673603127158>. PMID: 12642066

6. Ioannidis JPA (2005) Why Most Published Research Findings Are False. 2: 696–701. Available: <http://search.ebscohost.com/login.aspx?direct=true&db=aph&AN=18060403&site=ehost-live&scope=site>.
7. Ioannidis JP a, Munafò MR, Fusar-Poli P, Nosek B a, David SP (2014) Publication and other reporting biases in cognitive sciences: detection, prevalence, and prevention. *Trends Cogn Sci* 18: 235–241. Available: <http://www.ncbi.nlm.nih.gov/pubmed/24656991>. Accessed 10 July 2014. doi: [10.1016/j.tics.2014.02.010](https://doi.org/10.1016/j.tics.2014.02.010) PMID: [24656991](https://pubmed.ncbi.nlm.nih.gov/24656991/)
8. Young NS, Ioannidis JPA, Al-Ubaydi O (2008) Why Current Publication Practices May Distort Science. *Plos Med* 5: 1418–1422. Available: <Go to ISI>://WOS:000260424100003.
9. Khoury MJ, Little J, Higgins J, Ioannidis JPA, Gwinn M (2007) Why most published research findings are false: author's reply to Goodman and Greenland. *PLoS Med* 4: e215. PMID: [17593900](https://pubmed.ncbi.nlm.nih.gov/17593900/)
10. Sullivan PF (2007) Spurious Genetic Associations. *Biol Psychiatry* 61: 1121–1126. Available: <http://www.sciencedirect.com/science/article/pii/S0006322306014703>. PMID: [17346679](https://pubmed.ncbi.nlm.nih.gov/17346679/)
11. Caspi A, Sugden K, Moffitt TE, Taylor A, Craig IW, Harrington H, et al. (2003) Influence of Life Stress on Depression: Moderation by a Polymorphism in the 5-HTT Gene. *Science* (80-) 301: 386–389. Available: <http://www.sciencemag.org/content/301/5631/386.abstract>. PMID: [12869766](https://pubmed.ncbi.nlm.nih.gov/12869766/)
12. Karg K, Burmeister M, Shedden K, Sen S (2011) The serotonin transporter promoter variant (5-HTTLPR), stress, and depression meta-analysis revisited: evidence of genetic moderation. *Arch Gen Psychiatry* 68: 444–454. Available: <http://www.ncbi.nlm.nih.gov/pubmed/21199959>. doi: [10.1001/archgenpsychiatry.2010.189](https://doi.org/10.1001/archgenpsychiatry.2010.189) PMID: [21199959](https://pubmed.ncbi.nlm.nih.gov/21199959/)
13. Munafò MR, Brown SM, Hariri AR (2008) Serotonin transporter (5-HTTLPR) genotype and amygdala activation: a meta-analysis. *Biol Psychiatry* 63: 852–857. Available: <http://www.pubmedcentral.nih.gov/articlerender.fcgi?artid=2755289&tool=pmcentrez&rendertype=abstract>. Accessed 9 July 2014. PMID: [17949693](https://pubmed.ncbi.nlm.nih.gov/17949693/)
14. Risch N, Herrell R, Lehner T, Liang KY, Eaves L, Hoh J, et al. (2009) Interaction Between the Serotonin Transporter Gene (5-HTTLPR), Stressful Life Events, and Risk of Depression A Meta-analysis. *Jama-Journal Am Med Assoc* 301: 2462–2471. Available: <Go to ISI>://WOS:000267028100024.
15. Monroe SM (2008) Modern approaches to conceptualizing and measuring human life stress. *Annu Rev Clin Psychol* 4: 33–52. Available: 10.1146/annurev.clinpsy.4.022007.141207. Accessed 22 January 2014. PMID: [17716038](https://pubmed.ncbi.nlm.nih.gov/17716038/)
16. Uher R, McGuffin P (2010) The moderation by the serotonin transporter gene of environmental adversity in the etiology of depression: 2009 update. *Mol Psychiatry* 15: 18–22. Available: <Go to ISI>://WOS:000272992600008. doi: [10.1038/mp.2009.123](https://doi.org/10.1038/mp.2009.123) PMID: [20029411](https://pubmed.ncbi.nlm.nih.gov/20029411/)
17. Caspi A, Hariri AR, Holmes A, Uher R, Moffitt TE (2010) Genetic Sensitivity to the Environment: The Case of the Serotonin Transporter Gene and Its Implications for Studying Complex Diseases and Traits. *Am J Psychiatry* 167: 509–527. Available: <Go to ISI>://WOS:000277237100009. doi: [10.1176/appi.ajp.2010.09101452](https://doi.org/10.1176/appi.ajp.2010.09101452) PMID: [20231323](https://pubmed.ncbi.nlm.nih.gov/20231323/)
18. Caspi A, Hariri AR, Holmes A, Uher R, Moffitt TE (2010) Genetic Sensitivity to the Environment: The Case of the Serotonin Transporter Gene and Its Implications for Studying Complex Diseases and Traits. *Am J Psychiatry* 167: 509–527. Available: <Go to ISI>://WOS:000277237100009. doi: [10.1176/appi.ajp.2010.09101452](https://doi.org/10.1176/appi.ajp.2010.09101452) PMID: [20231323](https://pubmed.ncbi.nlm.nih.gov/20231323/)
19. Homberg JR, van den Hove DLA (2012) The serotonin transporter gene and functional and pathological adaptation to environmental variation across the life span. *Prog Neurobiol* 99: 117–127. Available: <http://www.sciencedirect.com/science/article/pii/S0304008212001359>. doi: [10.1016/j.pneurobio.2012.08.003](https://doi.org/10.1016/j.pneurobio.2012.08.003) PMID: [22954594](https://pubmed.ncbi.nlm.nih.gov/22954594/)
20. Zalsman G (2010) Timing is critical: Gene, environment and timing interactions in genetics of suicide in children and adolescents. *Eur Psychiatry* 25: 284–286. Available: <Go to ISI>://WOS:000280015100012. doi: [10.1016/j.eurpsy.2010.01.007](https://doi.org/10.1016/j.eurpsy.2010.01.007) PMID: [20444577](https://pubmed.ncbi.nlm.nih.gov/20444577/)
21. Lupien SJ, McEwen BS, Gunnar MR, Heim C (2009) Effects of stress throughout the lifespan on the brain, behaviour and cognition. *Nat Rev Neurosci* 10: 434–445. Available: <http://www.nature.com.proxy-ub.rug.nl/nrn/journal/v10/n6/full/nrn2639.html>. Accessed 25 May 2014. doi: [10.1038/nrn2639](https://doi.org/10.1038/nrn2639) PMID: [19401723](https://pubmed.ncbi.nlm.nih.gov/19401723/)
22. McEwen BS (2000) Effects of adverse experiences for brain structure and function. *Biol Psychiatry* 48: 721–731. Available: <http://www.sciencedirect.com/science/article/pii/S0006322300009641>. Accessed 12 June 2014. PMID: [11063969](https://pubmed.ncbi.nlm.nih.gov/11063969/)
23. Andersen SL, Teicher MH (2008) Stress, sensitive periods and maturational events in adolescent depression. *Trends Neurosci* 31: 183–191. Available: <Go to ISI>://WOS:000255613200004. doi: [10.1016/j.tins.2008.01.004](https://doi.org/10.1016/j.tins.2008.01.004) PMID: [18329735](https://pubmed.ncbi.nlm.nih.gov/18329735/)
24. Heim C, Binder EB (2012) Current research trends in early life stress and depression: Review of human studies on sensitive periods, gene—environment interactions, and epigenetics. *Exp Neurol* 233:

- 102–111. Available: <http://www.sciencedirect.com/science/article/pii/S0014488611004043>. doi: [10.1016/j.expneurol.2011.10.032](https://doi.org/10.1016/j.expneurol.2011.10.032) PMID: [22101006](https://pubmed.ncbi.nlm.nih.gov/22101006/)
25. Duncan LE, Keller MC (2011) A Critical Review of the First 10 Years of Candidate Gene-by-Environment Interaction Research in Psychiatry. *Am J Psychiatry* 168: 1041–1049. Available: <Go to ISI>://WOS:000295481200011. doi: [10.1176/appi.ajp.2011.11020191](https://doi.org/10.1176/appi.ajp.2011.11020191) PMID: [21890791](https://pubmed.ncbi.nlm.nih.gov/21890791/)
26. Martel MM (2013) Sexual Selection and Sex Differences in the Prevalence of Childhood Externalizing and Adolescent Internalizing Disorders. *Psychol Bull*. Available: doi: [10.1037/a0032247](https://doi.org/10.1037/a0032247)
27. Williams RB, Marchuk D a, Gadde KM, Barefoot JC, Grichnik K, Helms MJ, et al. (2003) Serotonin-related gene polymorphisms and central nervous system serotonin function. *Neuropsychopharmacology* 28: 533–541. Available: <http://www.ncbi.nlm.nih.gov/pubmed/12629534>. Accessed 23 May 2014. PMID: [12629534](https://pubmed.ncbi.nlm.nih.gov/12629534/)
28. Uher R, McGuffin P (2008) The moderation by the serotonin transporter gene of environmental adversity in the aetiology of mental illness: review and methodological analysis. *Mol Psychiatry* 13: 131–146. Available: <http://www.ncbi.nlm.nih.gov/pubmed/17700575>. Accessed 24 January 2014. PMID: [17700575](https://pubmed.ncbi.nlm.nih.gov/17700575/)
29. Hu X, Lipsky RH, Zhu G, Akhtar LA, Taubman J, Greenberg BD, et al. (2006) Serotonin Transporter Promoter Gain-of-Function Genotypes Are Linked to Obsessive-Compulsive Disorder. *Am J Hum Genet* 78: 815–826. Available: <http://www.sciencedirect.com/science/article/pii/S0002929707638166>. PMID: [16642437](https://pubmed.ncbi.nlm.nih.gov/16642437/)
30. Flint J, Munafò MR (2013) Candidate and non-candidate genes in behavior genetics. *Curr Opin Neurobiol* 23: 57–61. Available: <http://www.sciencedirect.com/science/article/pii/S0959438812001146>. doi: [10.1016/j.conb.2012.07.005](https://doi.org/10.1016/j.conb.2012.07.005) PMID: [22878161](https://pubmed.ncbi.nlm.nih.gov/22878161/)
31. Martin J, Cleak J, Willis-Owen SAG, Flint J, Shifman S (2007) Mapping regulatory variants for the serotonin transporter gene based on allelic expression imbalance. *Mol Psychiatry* 12: 421–422. Available: <Go to ISI>://WOS:000245947900002. PMID: [17453058](https://pubmed.ncbi.nlm.nih.gov/17453058/)
32. Laucht M, Treutlein J, Blomeyer D, Buchmann AF, Schmid B, Becker K, et al. (2009) Interaction between the 5-HTTLPR serotonin transporter polymorphism and environmental adversity for mood and anxiety psychopathology: evidence from a high-risk community sample of young adults. *Int J Neuropsychopharmacol* 12: 737–747. Available: <Go to ISI>://WOS:000267722800003. doi: [10.1017/S1461145708009875](https://doi.org/10.1017/S1461145708009875) PMID: [19154632](https://pubmed.ncbi.nlm.nih.gov/19154632/)
33. Markus CR (2013) Interaction between the 5-HTTLPR genotype, impact of stressful life events, and trait neuroticism on depressive symptoms in healthy volunteers. *Psychiatr Genet* 23: 108–116. Available: <Go to ISI>://WOS:000318011800002. doi: [10.1097/YPG.0b013e32835fe3e1](https://doi.org/10.1097/YPG.0b013e32835fe3e1) PMID: [23492930](https://pubmed.ncbi.nlm.nih.gov/23492930/)
34. Sheikh HI, Hayden EP, Singh SM, Dougherty LR, Olino TM, Durbin CE, et al. (2008) An examination of the association between the 5-HTT promoter region polymorphism and depressogenic attributional styles in childhood. *Pers Individ Dif* 45: 425–428. Available: <Go to ISI>://WOS:000258562300017. PMID: [19122845](https://pubmed.ncbi.nlm.nih.gov/19122845/)
35. Roisman GI, Newman D a, Fraley RC, Haltigan JD, Groh AM, Haydon KC (2012) Distinguishing differential susceptibility from diathesis-stress: recommendations for evaluating interaction effects. *Dev Psychopathol* 24: 389–409. Available: <http://www.ncbi.nlm.nih.gov/pubmed/22559121>. Accessed 21 January 2014. doi: [10.1017/S0954579412000065](https://doi.org/10.1017/S0954579412000065) PMID: [22559121](https://pubmed.ncbi.nlm.nih.gov/22559121/)
36. Munafò MR, Flint J (2009) Replication and heterogeneity in gene x environment interaction studies. *Int J Neuropsychopharmacol* 12: 727–729. Available: <http://www.ncbi.nlm.nih.gov/pubmed/19476681>. Accessed 30 April 2014. doi: [10.1017/S1461145709000479](https://doi.org/10.1017/S1461145709000479) PMID: [19476681](https://pubmed.ncbi.nlm.nih.gov/19476681/)
37. Simmons JP, Nelson LD, Simonsohn U (2011) False-positive psychology: undisclosed flexibility in data collection and analysis allows presenting anything as significant. *Psychol Sci* 22: 1359–1366. Available: <http://www.ncbi.nlm.nih.gov/pubmed/22006061>. Accessed 28 April 2014. doi: [10.1177/0956797611417632](https://doi.org/10.1177/0956797611417632) PMID: [22006061](https://pubmed.ncbi.nlm.nih.gov/22006061/)
38. Fergusson DM, Horwood LJ, Miller AL, Kennedy MA (2011) Life stress, 5-HTTLPR and mental disorder: findings from a 30-year longitudinal study. *Br J Psychiatry* 198: 129–135. Available: <Go to ISI>://WOS:000287173400010. doi: [10.1192/bjp.bp.110.085993](https://doi.org/10.1192/bjp.bp.110.085993) PMID: [21282783](https://pubmed.ncbi.nlm.nih.gov/21282783/)
39. Ormel J, Oldehinkel AJ, Sijtsma J, van Oort F, Raven D, Veenstra R, et al. (2012) The TRacking Adolescents' Individual Lives Survey (TRAILS): design, current status, and selected findings. *J Am Acad Child Adolesc Psychiatry* 51: 1020–1036. Available: <http://www.sciencedirect.com/science/article/pii/S0890856712005941>. Accessed 18 March 2014. doi: [10.1016/j.jaac.2012.08.004](https://doi.org/10.1016/j.jaac.2012.08.004) PMID: [23021478](https://pubmed.ncbi.nlm.nih.gov/23021478/)
40. Nederhof E, Jorg F, Raven D, Veenstra R, Verhulst FC, Ormel J, et al. (2012) Benefits of extensive recruitment effort persist during follow-ups and are consistent across age group and survey method. The TRAILS study. *Bmc Med Res Methodol* 12. Available: <Go to ISI>://WOS:000316669000001.

41. De Winter AF, Oldehinkel AJ, Veenstra R, Brunnekreef JA, Verhulst FC, Ormel J (2005) Evaluation of non-response bias in mental health determinants and outcomes in a large sample of pre-adolescents. *Eur J Epidemiol* 20: 173–181. PMID: [15792285](#)
42. Achenbach TM, Dumenci L, Rescorla LA (2003) DSM-oriented and empirically based approaches to constructing scales from the same item pools. *J Clin Child Adolesc Psychol* 32: 328–340. Available: [10.1207/S15374424JCCP320302](#). Accessed 29 May 2014. PMID: [12881022](#)
43. Achenbach TM, Rescorla LA (2001) Manual for the ASEBA School-Age Forms & Profiles. Burlington, VT: doi: [10.1007/s00127-013-0685-z](#) PMID: [23604619](#)
44. American Psychiatric Association. Task Force on DSM-IV., APA (2000) Diagnostic and statistical manual of mental disorders: DSM-IV-TR. Washington, DC: American Psychiatric Association.
45. Kessler RC, Üstün TB (2004) The World Mental Health (WMH) Survey Initiative Version of the World Health Organization (WHO) Composite International Diagnostic Interview (CIDI). *Int J Methods Psychiatr Res* 13: 93–121. Available: [http://www.ncbi.nlm.nih.gov/pubmed/15297906](#). PMID: [15297906](#)
46. Haro JM, Arbabzadeh-Bouchez S, Brugha TS, de Girolamo G, Guyer ME, Jin R, et al. (2006) Concordance of the Composite International Diagnostic Interview Version 3.0 (CIDI 3.0) with standardized clinical assessments in the WHO World Mental Health surveys. *Int J Methods Psychiatr Res* 15: 167–180. Available: [http://www.ncbi.nlm.nih.gov/pubmed/17266013](#). Accessed 10 September 2014. PMID: [17266013](#)
47. Kessler RC, Avenevoli S, Costello EJ, Green JG, Gruber MJ, Heeringa S, et al. (2009) Design and field procedures in the US National Comorbidity Survey Replication Adolescent Supplement (NCS-A). *Int J Methods Psychiatr Res* 18: 69–83. Available: [http://www.pubmedcentral.nih.gov/articlerender.fcgi?artid=2774712&tool=pmcentrez&rendertype=abstract](#). Accessed 10 September 2014. doi: [10.1002/mpr.279](#) PMID: [19507169](#)
48. Bernstein DP, Fink L (1998) Childhood Trauma Questionnaire: A retrospective self-report manual. San Antonio, TX Psychol Corp.
49. Miller S, Dykes D, Polesky H (1988) A simple salting out procedure for extracting DNA from human nucleated cells. *Nucleic Acids Res* 16: 55404. Available: [http://www.ncbi.nlm.nih.gov/pmc/articles/pmc334765/](#). Accessed 15 January 2015.
50. Nederhof E, Bouma EMC, Oldehinkel AJ, Ormel J (2010) Interaction between childhood adversity, brain-derived neurotrophic factor val/met and serotonin transporter promoter polymorphism on depression: the TRAILS study. *J Biol Psychiatry* 68: 209–212. doi: [10.1016/j.biopsych.2010.04.006](#) PMID: [20553751](#)
51. IBM Corp. Released 2012. IBM SPSS Statistics for Windows, Version 21.0. Armonk, NY: IBM Corp. (n.d.).
